# Supplementary material
Source: PubMed Central journal article supplement (PMC2909317)

**A**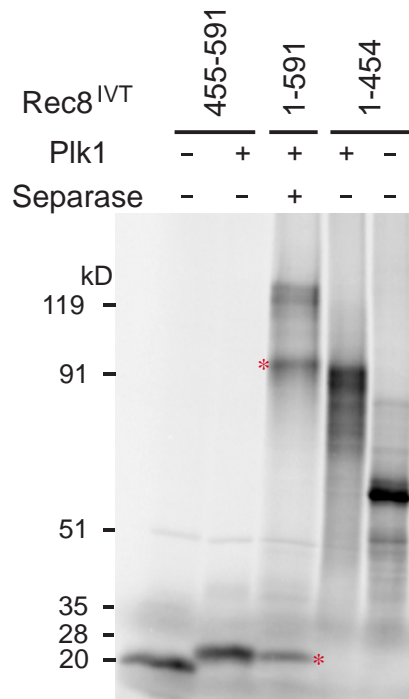**B**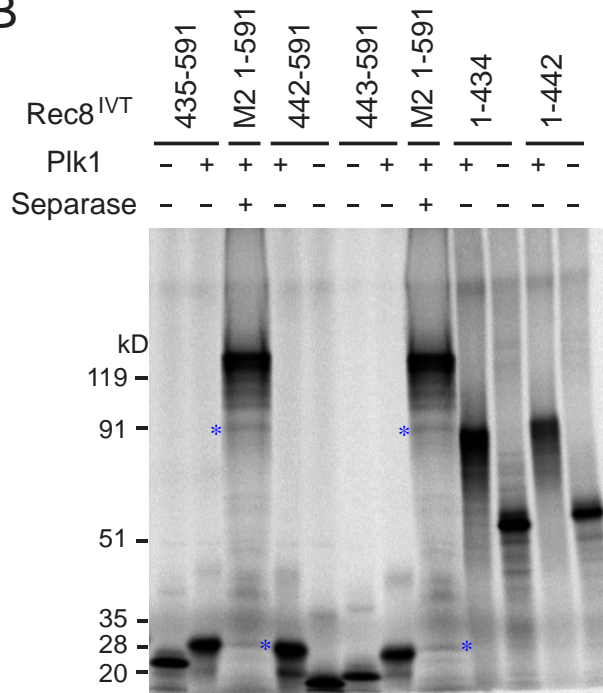

Supplement: supp_122_15_2686__1.pdf [file supp_122_15_2686__1.pdf]
